# Supplementary material for: Acceptable symbiont cell size differs among cnidarian species and may limit symbiont diversity
Source: PubMed Central journal article supplement (PMC5520142; doi:10.1038/ismej.2017.17), 2017-03-21
Supplement: ismej201717x1.pdf [file ismej201717x1.pdf]

**Table S1. *Symbiodinium* strains used for infection tests.**

All *Symbiodinium* strains were obtained from culture collections. *Symbiodinium* strains whose genotype did not match the information provided from the culture collection center, or previous studies, were renamed. Phylotypes were assigned by comparison with the GeoSymbio ITS2 sequence database. For L2469, L830 and L1633, no clear match was found in the database. In these cases the clade assigned to the top blastn hit in Genbank is presented; these sequences are distinct from GeoSymbio cladeA3.

| Strains              | Genotypes     | Original source of isolation                           | Cell size group |
|----------------------|---------------|--------------------------------------------------------|-----------------|
| Mf1.05b              | B1            | Scleractinia coral<br>( <i>Orbicella faveolata</i> )   | small           |
| CS-164               | B1            | Sea anemone<br>( <i>Aiptasia tagetes</i> )             |                 |
| CCMP2470             | B1            | Octocoral<br>( <i>Antillologorgia bipinnata</i> )      |                 |
| CCMP2462             | B3            | Jellyfish<br>( <i>Dichotomia</i> sp.)                  |                 |
| CCMP2459             | B2            | Scleractinia coral<br>( <i>Oculina diffusa</i> )       |                 |
| CCMP2458             | A1            | Jellyfish<br>( <i>Cassiopeia andromeda</i> )           | Medium          |
| CCMP2457             | A3            | Giant clam<br>( <i>Tridacna crocea</i> )               |                 |
| CCMP2464             | A1            | Jellyfish<br>( <i>Cassiopeia xamachana</i> )           |                 |
| CCMP2467             | A1            | Scleractinia coral<br>( <i>Stylophora pistillata</i> ) |                 |
| CCMP2465             | A3            | Giant Clam<br>( <i>Tridacna maxima</i> )               |                 |
| M2456<br>(*CCMP2456) | A3<br>(#A4)   | Octocoral<br>( <i>Plexaura homamalla</i> )             |                 |
| Zs-H412              | A2            | Zoanthid<br>( <i>Zoanthus sociatus</i> )               | Large           |
| L2469<br>(*CCMP2469) | A3<br>(#A1.1) | Sea anemone<br>( <i>Condylactis gigantea</i> )         |                 |
| L830<br>(*CCMP830)   | A3<br>(#B)    | Sea anemone<br>( <i>Aiptasia pallida</i> )             |                 |
| L1633<br>(*CCMP1633) | A3<br>(#B)    | Sea anemone<br>( <i>Aiptasia pulchella</i> )           |                 |

\*, original strains; #, genetic background provided from culture collection center or previous study.
