# Supplementary material for: Acceptable symbiont cell size differs among cnidarian species and may limit symbiont diversity
Source: PubMed Central journal article supplement (PMC5520142; doi:10.1038/ismej.2017.17), 2017-03-21
Supplement: ismej201717x4.pdf [file ismej201717x4.pdf]

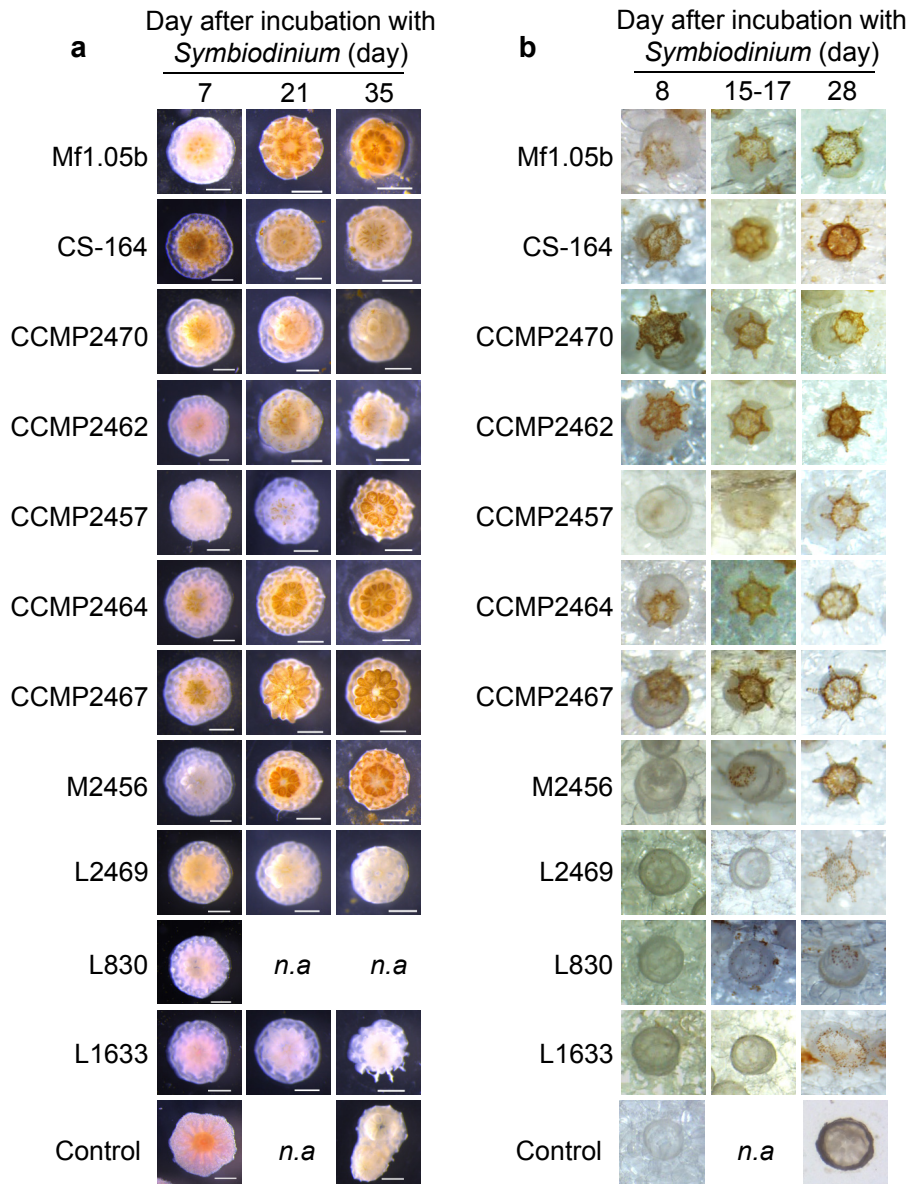

**Figure S3** Infection of different *Symbiodinium* strains into corals. Aposymbiotic primal polyps of *A. tenuis* (a; scale bars, 500  $\mu$ m) and *C. serailia* (b) were separately incubated with different *Symbiodinium* strains. Uptake of *Symbiodinium* into coral polyps was monitored using a stereomicroscope. Control, without *Symbiodinium*; n.a., not available.
