# Supplementary material for: Acceptable symbiont cell size differs among cnidarian species and may limit symbiont diversity
Source: PubMed Central journal article supplement (PMC5520142; doi:10.1038/ismej.2017.17), 2017-03-21
Supplement: ismej201717x5.pdf [file ismej201717x5.pdf]

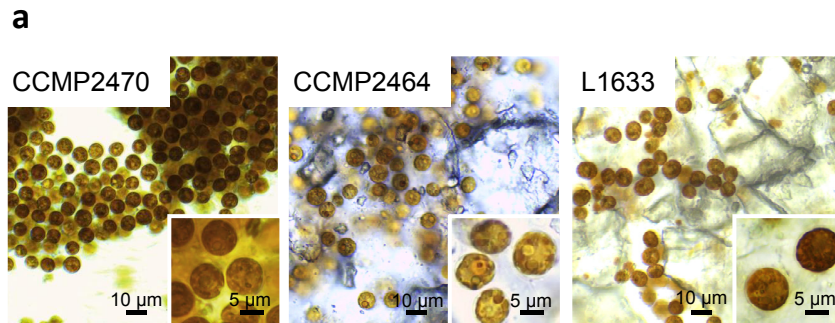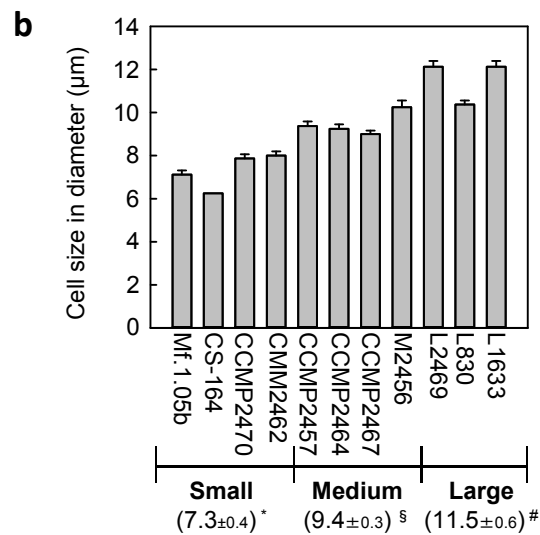

**Figure S4** *Symbiodinium* cell size in corals. *Symbiodinium* cells were isolated from *C. serailia* polyps infected by different *Symbiodinium* strains. (a) *Symbiodinium* cells isolated. (b) Average cell size in diameter. Numbers below the *Symbiodinium* cell size group show the average cell diameter ( $\mu$ m) for all strains in that group. Different symbols (\*, §, and #) indicate significant difference ( $P < 0.01$ ) between groups. Error bars,  $\pm$  standard error ( $n = 10$ ).
